# Supplementary material for: Self-reactivity of CD8 T-cell clones determines their differentiation status rather than their responsiveness in infections
Source: PubMed Central journal article supplement (PMC9582129; doi:10.3389/fimmu.2022.1009198), 2022-10-06
Supplement: DataSheet_1.pdf [file DataSheet_1.pdf]

**Fig. S1**

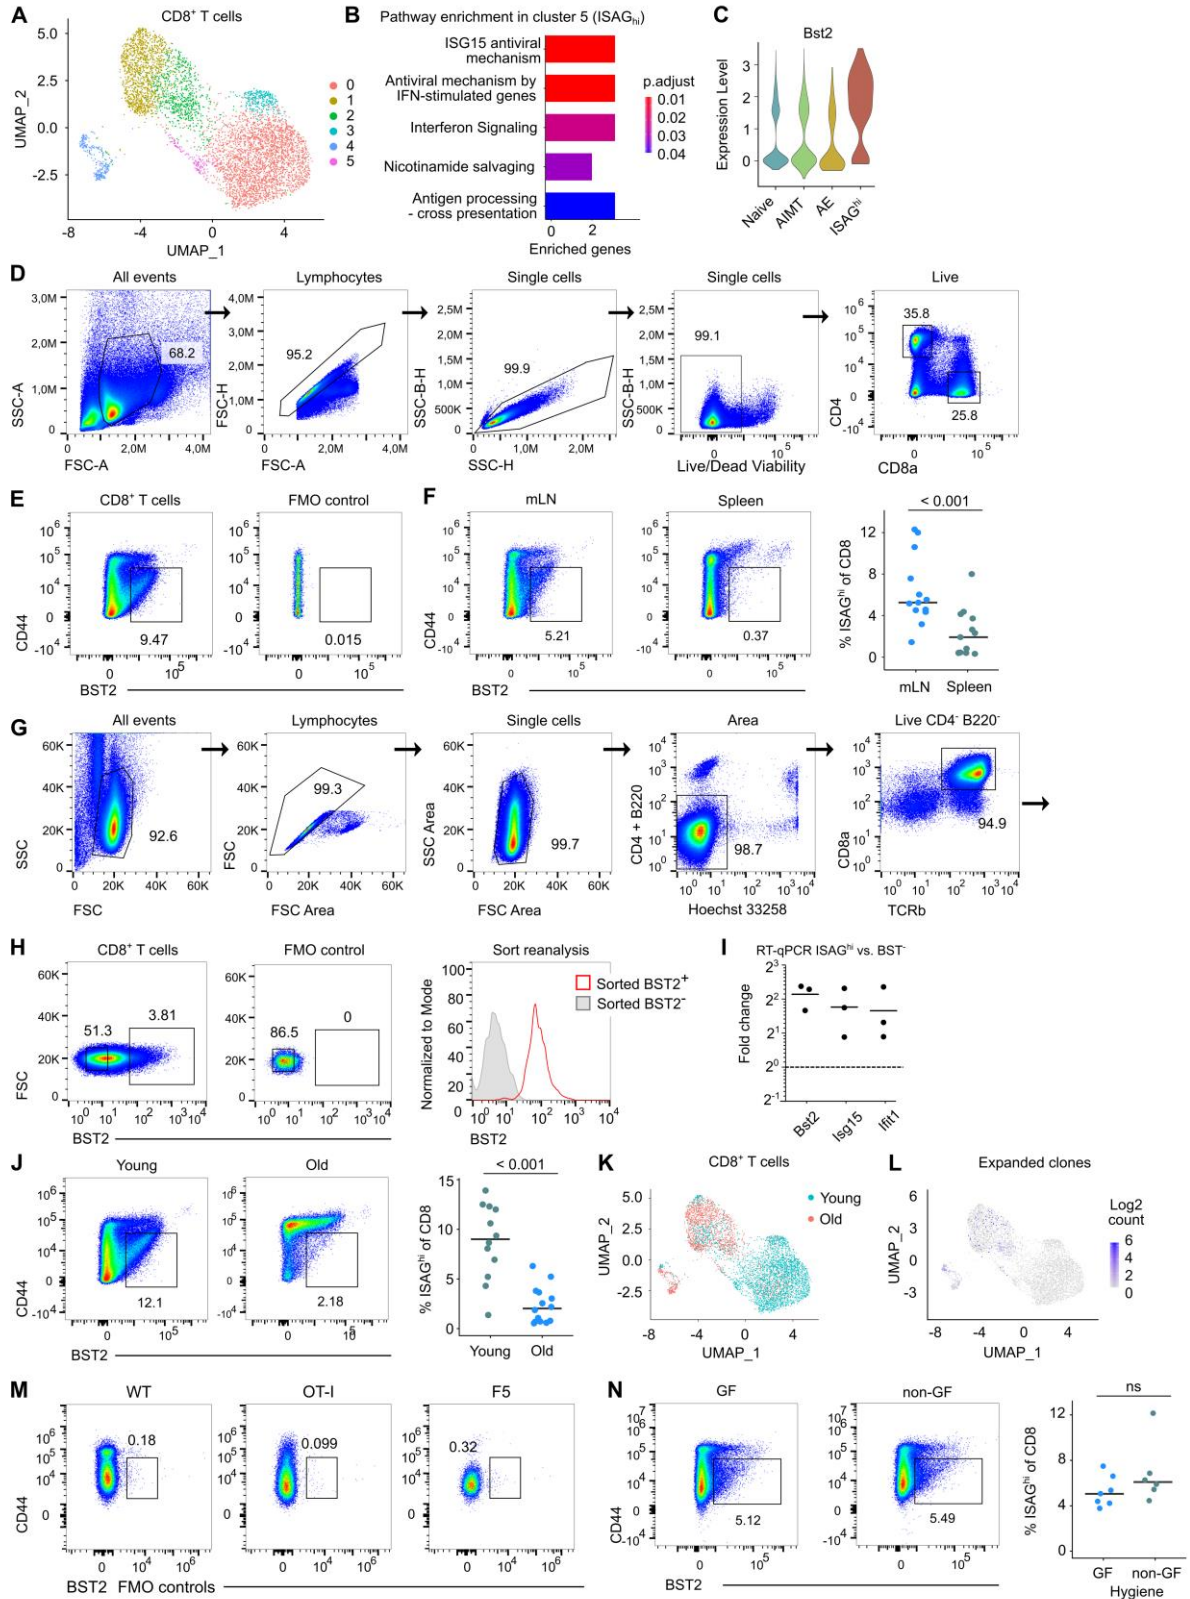

**Supplementary Figure 1.** (A) UMAP projection of sorted CD8<sup>+</sup> T cells from peripheral blood of C57BL6/J mice processed by scRNAseq. Cells are colored by clusters. (B) Reactome pathways significantly enriched in ISAG<sup>hi</sup> cells (cluster 5). (C) The violin plots show the expression of *Bst2* in naïve, AIMT, AE, and ISAG<sup>hi</sup> cells. (D-F) Flow cytometry analysis of CD44<sup>low</sup> BST2<sup>+</sup> ISAG<sup>hi</sup> T cells in WT mice. (D) A representative gating strategy for experiments showed in Fig. 1 and in this figure. (E) A representative gating of ISAG<sup>hi</sup> T cells as CD44<sup>low</sup> BST2<sup>+</sup> and the full minus one staining (FMO) control. The FMO control was stained with secondary anti-biotin antibody without the primary BST2-biotin antibody. (F) The percentage of ISAG<sup>hi</sup> T cells of viable CD8<sup>+</sup> T cells in the mLN and the spleen. n = 13 mice in three independent experiments. The statistical analysis was performed using the two-tailed Mann Whitney U test. (G-H) A representative gating strategy for sorting BST2<sup>+</sup> and BST2<sup>-</sup> T cells by FACS. (G) Gating of viable CD8<sup>+</sup> T cells. (H) The sorting gates for BST2<sup>+</sup> and BST2<sup>-</sup> T cells (left). FMO control stained with secondary anti-biotin antibody without the primary BST2-biotin antibody (middle). Reanalysis of FACS-sorted BST2<sup>+</sup> and BST2<sup>-</sup> cells (right). A representative experiment out of three in total. (I) Relative expression of *Bst2*, *Isg15*, and *Ifit1* in sorted BST2<sup>+</sup> or BST2<sup>-</sup> T cells measured by qPCR. C<sub>T</sub> values of selected genes were normalized to the geometric mean of the C<sub>T</sub> values of reference genes *Gapdh*, *Tubb2a*, and *Eef1a1*. The expression levels in BST2<sup>+</sup> are normalized to those of BST2<sup>-</sup> (=1). The horizontal line represents the mean. Three biological replicates. (J) Percentage of ISAG<sup>hi</sup> T cells of viable CD8<sup>+</sup> T cells in the mLN of young (7-12 weeks old) and old (76-81 weeks old) mice. Young: n = 13, old: n = 15 mice in three independent experiments. (K) UMAP projection showing the age of mice from which the cells were isolated (young = 8 weeks old, old = 88 weeks old). (L) UMAP projection showing the clonal expansion as log2 count of other cells with the same TCR $\alpha$  CDR3 and TCR $\beta$  CDR3 nucleotide sequences. Unique clones are grey. (M) FMO controls (only secondary anti-biotin antibody without the primary BST2-biotin antibody) for the experiment shown in Fig. 1L. A representative experiment out of three in total. (N) Percentage of ISAG<sup>hi</sup> T cells of viable CD8<sup>+</sup> T cells in the mLN of young mice maintained in germ-free (GF) or non-germ-free (SPF or conventional) facilities. GF: n = 7, non-GF: n = 6 mice in two independent experiments.

**Fig. S2**

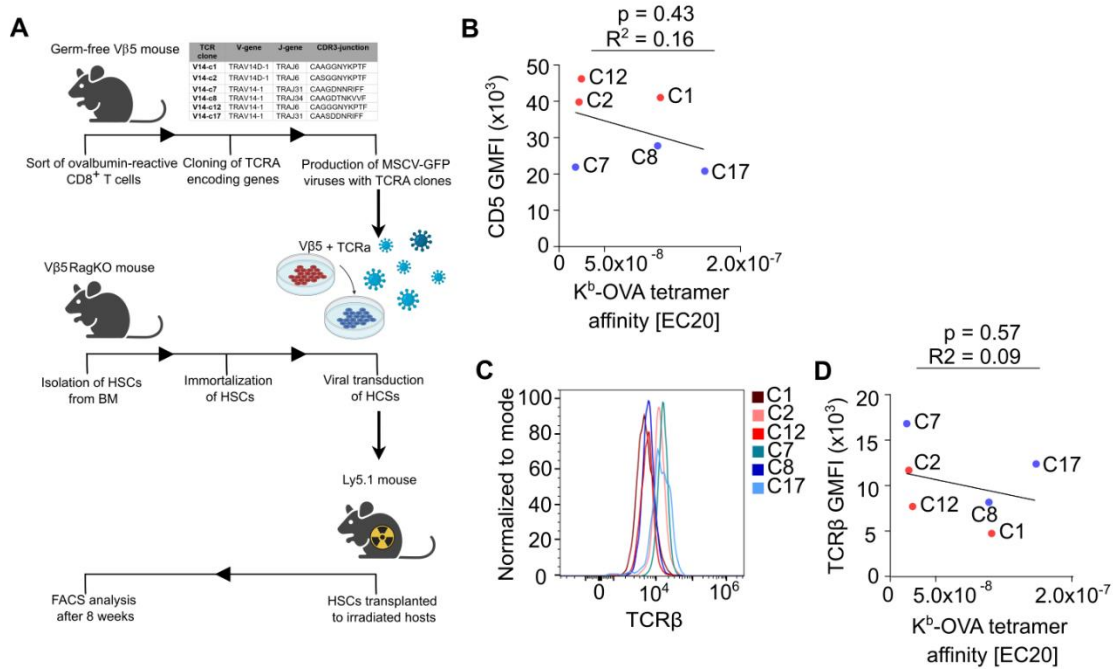

**Supplementary Figure 2.** (A) Scheme of generation retrogenic clonal populations with indicated CDR3 sequences of particular clones. (B) Linear fit of CD5 gMFI vs K<sup>b</sup>-OVA tetramer affinity (EC20), determined in the experiment in Figure 2C. (C) Expression of surface TCRβ in LN T cells was measured by flow cytometry. A representative experiment out of three in total. (D) Linear fit of TCRβ gMFI vs K<sup>b</sup>-OVA tetramer affinity (EC20), determined in the experiment in Figure 2C. The Pearson correlation coefficient and p value is shown.

**Fig. S3**

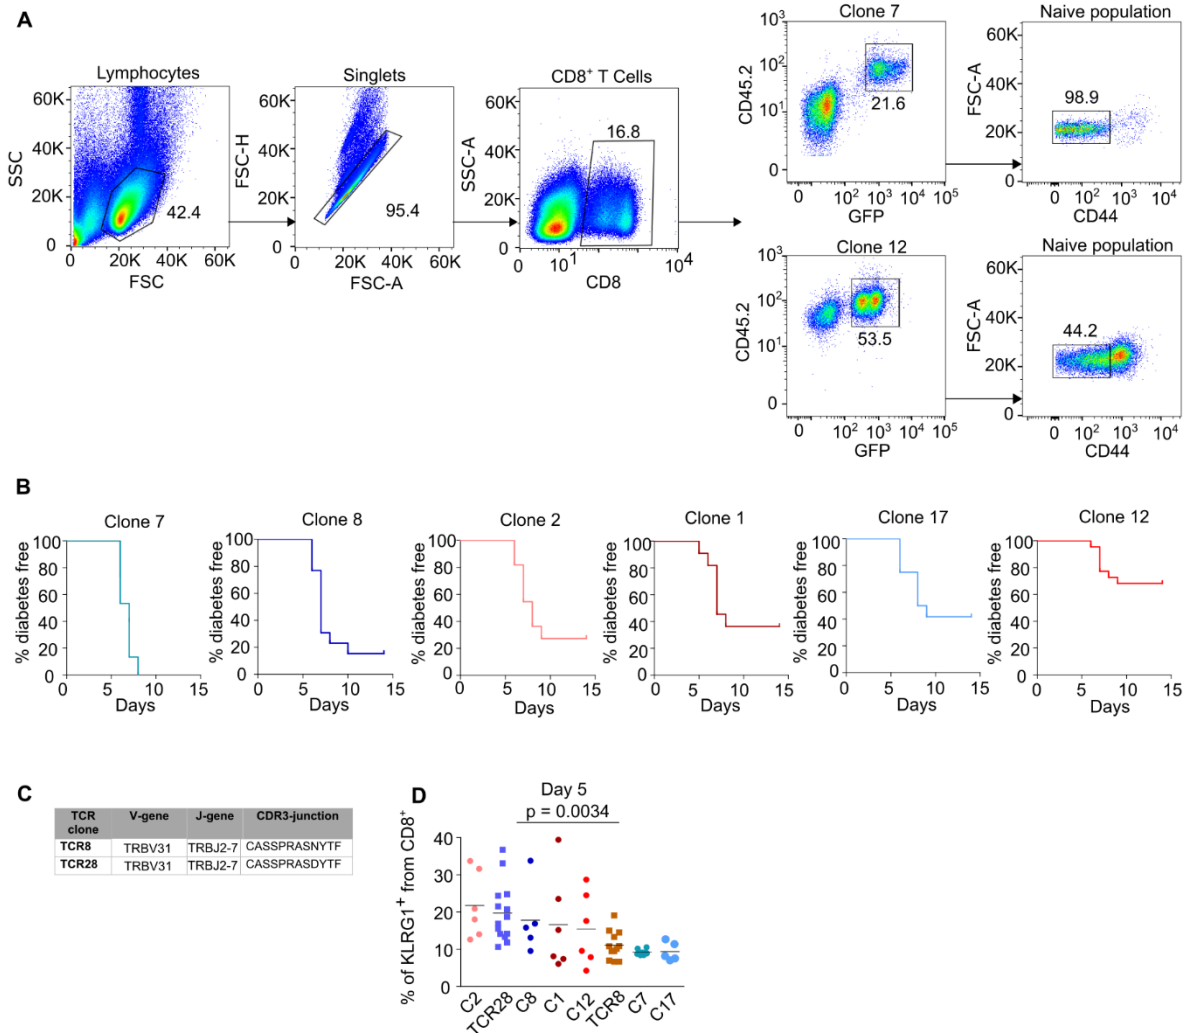

**Supplementary Figure 3. (A)** Gating strategy for sorting of the naive monoclonal T cells from transplanted Ly5.1 mice. **(B)** The percentage of diabetes-free mice (i.e., with urine glucose < 1000 mg/dl) in time after the adoptive transfer of the indicated T-cell clone and priming with Lm-OVA on day 0. The same experiment as shown in Fig. 3B. n = 11-22 from three (C1, C2, C8, C17) or four (C7, C12) independent experiments.

**(C)** CDR3 sequences of TCR8 and TCR28. **(D)** The percentage of KLRG1<sup>+</sup> cells among adoptively transferred monoclonal T cells five days after the Lm-OVA infection was determined by flow cytometry (corresponding to the experiments shown in Figure 3G). Mean + SEM. n = 6-12 per group from three independent experiments. The statistical analysis was performed using the Kruskal-Wallis test.

**Fig. S4**

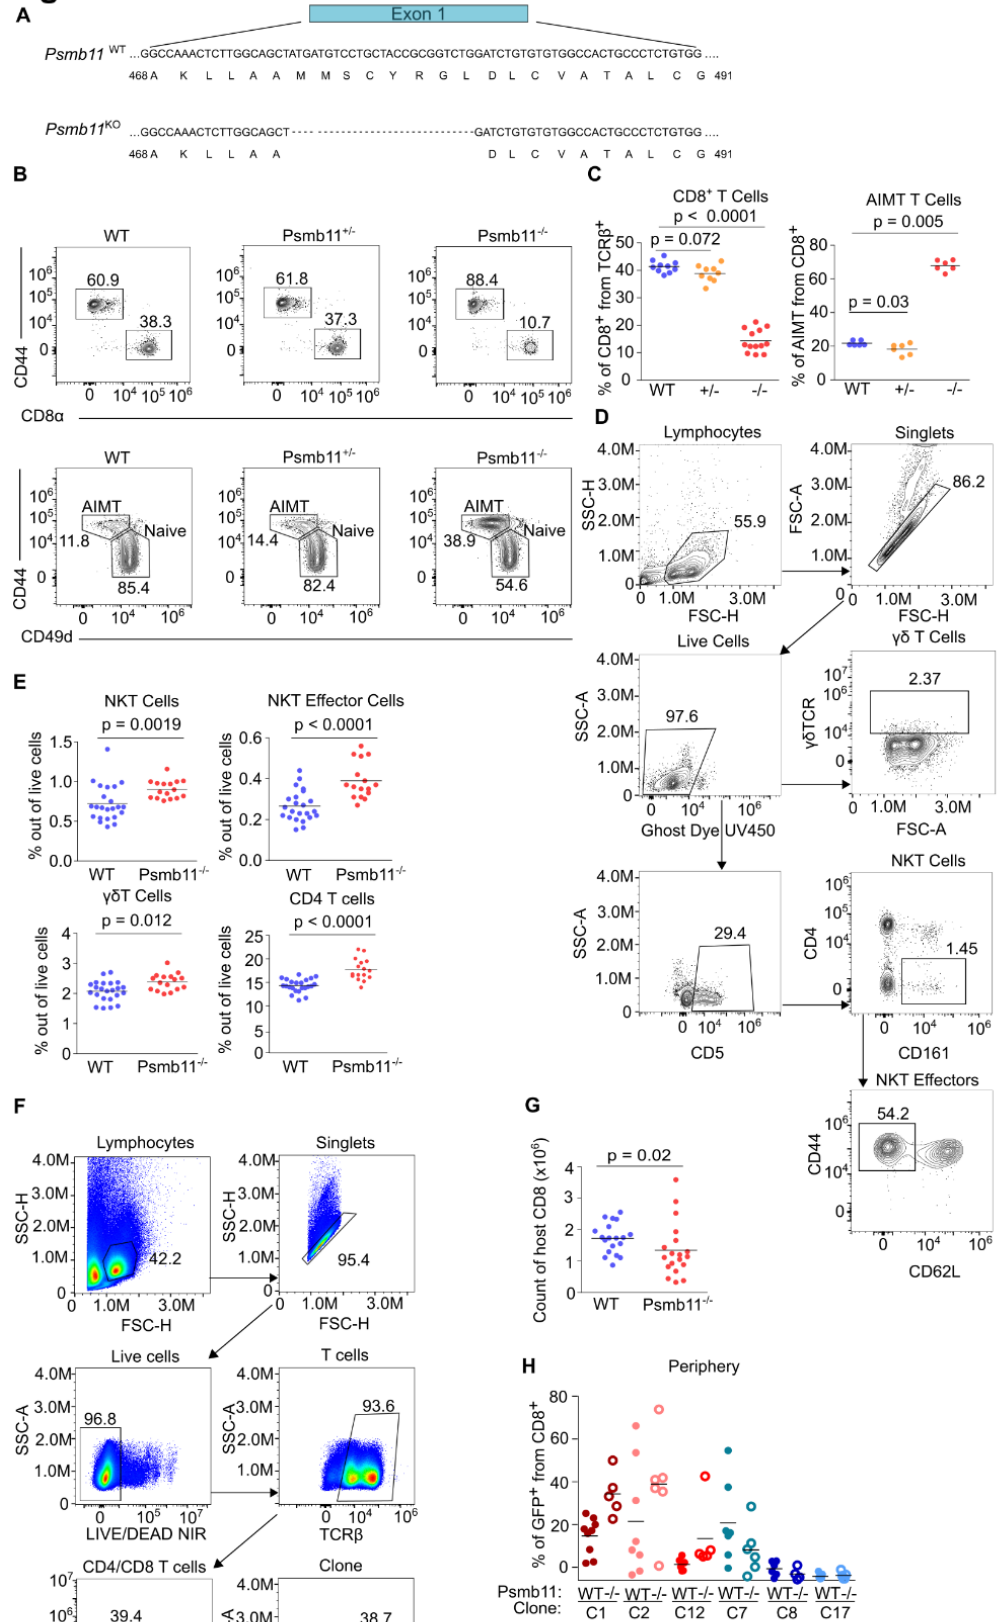

**Supplementary Figure S4.** (A) Scheme of targeting of the *Psmb11* locus for the generation of the *Psmb11*<sup>-</sup> allele by CRISPR/Cas9. (B) Representative flow cytometry plots showing the percentage of CD8<sup>+</sup> and CD4<sup>+</sup> T cells among TCRβ<sup>+</sup> splenocytes (top) and the percentage of AIMT (CD44<sup>+</sup> CD49<sup>-</sup>) cells among viable CD8<sup>+</sup> TCRβ<sup>+</sup> splenocytes (bottom) from WT, *Psmb11*<sup>-/-</sup> mice, and heterozygous mice. A representative experiment out of three in total. (C) The quantification of the frequency of CD8<sup>+</sup> T cells and AIMT cells from isolated splenocytes in indicated mice. n = 10-13 in three independent experiments. The statistical significance was calculated using the two-tailed Mann Whitney U test. (D) A representative gating strategy for the analysis of γδ T cells, NKT cells and NKT effector cells in the spleen. (E) The percentage of NKT cells, NKT effector cells, γδ T cells, and CD4<sup>+</sup> T cells from all live cells in the spleens of WT and *Psmb11*<sup>-/-</sup> mice. n = 16–22 in three independent experiments. The statistical significance was calculated using the two-tailed Mann Whitney U test. Mean. (F) A representative gating strategy for the analysis of bone marrow chimeras in WT and *Psmb11*<sup>-/-</sup> recipient mice. (G) Absolute numbers of LN CD8<sup>+</sup> T cells from WT and *Psmb11*<sup>-/-</sup> recipients. n = 19 in three independent experiments. The statistical analysis was performed using the Mann-Whitney U test. (H) Percentage of the donor cells (GFP<sup>+</sup>) from all six clones in the LN of WT and *Psmb11*<sup>-/-</sup> recipients 8 weeks after the bone marrow transplantations. Median. n = 4-8 mice per group from three independent experiments.

### **Supplementary Table 1**

Differentially expressed genes in clusters 0-5 in the scRNAseq analysis shown in Fig. S1A. The table columns show: the gene name; p-value; average fold change between the cells in the cluster and other cells (log2); frequency of cells with detected expression of the gene in the cluster; frequency of cells with detected expression of the gene outside the cluster; adjusted p value; number of the cluster. The table rows show individual differentially expressed genes.
